# Supplementary material for: Trends in healthcare utilisation of patients with migraine in South Korea: a retrospective observational study using Health Insurance Review and Assessment Service National Patient Sample data from 2010 to 2018
Source: HighWire-hosted journal article supplement (doi:10.1136/bmjopen-2021-059926), 2023-03-01
Supplement: bmjopen-2021-059926supp001_data_supplement.pdf [file bmjopen-2021-059926supp001_data_supplement.pdf]

**Supplementary file 1.** Annual average KRW-USD exchange rate and price level of health expenditure

| <b>Year</b> | <b>KRW/USD</b>  | <b>Price level</b> |
|-------------|-----------------|--------------------|
| 2010        | 1,156.00        | 0.9345             |
| 2011        | 1,107.99        | 0.9510             |
| 2012        | 1,126.76        | 0.9597             |
| 2013        | 1,095.04        | 0.9631             |
| 2014        | 1,053.12        | 0.9699             |
| 2015        | 1,131.52        | 0.9820             |
| 2016        | 1,160.41        | 0.9918             |
| 2017        | 1,130.48        | 1.0005             |
| <b>2018</b> | <b>1,100.58</b> | <b>1.0000</b>      |

This information is available on the following website: Korean Statistical Information Service (<http://kosis.kr>).

The price level of health expenses is adjusted as of the year 2018.

**Supplementary file 2.** General medical service use for migraine patients in Korea

| Year | Type of visit | Number of patients | Total claims  | Total expenditure (USD) | Average expenditure per patient (USD) | Average expenditure per claim (USD) |
|------|---------------|--------------------|---------------|-------------------------|---------------------------------------|-------------------------------------|
| 2010 | Total         | <b>19,468</b>      | <b>46,846</b> | 921,857.88              | 47.35                                 | 19.68                               |
|      | WM            | 14,485             | 27,590        | 620,133.28              | <b>42.81</b>                          | 22.48                               |
|      | KM            | 4,983              | 19,256        | 301,724.60              | <b>60.55</b>                          | 15.67                               |
| 2011 | Total         | 19,964             | 48,551        | 1,027,627.69            | 51.47                                 | 21.17                               |
|      | WM            | 14,739             | 28,891        | 692,485.00              | <b>46.98</b>                          | 23.97                               |
|      | KM            | 5,225              | 19,660        | 335,142.69              | <b>64.14</b>                          | 17.05                               |
| 2012 | Total         | 20,061             | 50,487        | 1,045,607.09            | 52.12                                 | 20.71                               |
|      | WM            | 15,141             | 31,127        | 720,382.76              | <b>47.58</b>                          | 23.14                               |
|      | KM            | 4,920              | 19,360        | 325,224.33              | <b>66.10</b>                          | 16.80                               |
| 2013 | Total         | 19,984             | 51,765        | 1,126,280.21            | 56.36                                 | 21.76                               |
|      | WM            | 15,090             | 30,993        | 755,195.51              | <b>50.05</b>                          | 24.37                               |
|      | KM            | 4,894              | 20,772        | 371,084.70              | <b>75.82</b>                          | 17.86                               |
| 2014 | Total         | 19,829             | 50,088        | 1,240,977.56            | 62.58                                 | 24.78                               |
|      | WM            | 15,065             | 30,202        | 863,047.30              | <b>57.29</b>                          | 28.58                               |
|      | KM            | 4,764              | 19,886        | 377,930.26              | <b>79.33</b>                          | 19.00                               |
| 2015 | Total         | 19,950             | 50,259        | 1,189,466.10            | 59.62                                 | 23.67                               |
|      | WM            | 15,277             | 32,393        | 862,879.74              | <b>56.48</b>                          | 26.64                               |
|      | KM            | 4,673              | 17,866        | 326,586.36              | <b>69.89</b>                          | 18.28                               |
| 2016 | Total         | 21,228             | 53,705        | 1,361,904.76            | 64.16                                 | 25.36                               |
|      | WM            | 16,583             | 34,207        | 1,011,548.55            | <b>61.00</b>                          | 29.57                               |
|      | KM            | 4,645              | 19,498        | 350,356.21              | <b>75.43</b>                          | 17.97                               |

|      |       |               |               |              |              |       |
|------|-------|---------------|---------------|--------------|--------------|-------|
| 2017 | Total | 20,484        | 52,656        | 1,521,687.53 | 74.29        | 28.90 |
|      | WM    | 16,087        | 33,808        | 1,163,607.00 | <b>72.33</b> | 34.42 |
|      | KM    | 4,397         | 18,848        | 358,080.53   | <b>81.44</b> | 19.00 |
| 2018 | Total | <b>20,802</b> | <b>52,729</b> | 1,711,219.60 | 82.26        | 32.45 |
|      | WM    | 16,792        | 36,607        | 1,361,558.17 | <b>81.08</b> | 37.19 |
|      | KM    | 4,010         | 16,122        | 349,661.43   | <b>87.20</b> | 21.69 |

All expenditures were converted based on the annual average exchange rate (KRW/USD) and the price is adjusted as of health expenditure price level of year 2018. (See Supplementary file 1 for detail)

**Supplementary file 3. Claims of healthcare utilization**

| Category            |                                                 | Total<br>(2010–2018) |              | WM institutions<br>(2010–2018) |              | KM institutions<br>(2010–2018) |              |
|---------------------|-------------------------------------------------|----------------------|--------------|--------------------------------|--------------|--------------------------------|--------------|
| Type of visit       | Outpatient                                      | 449,152              | <b>99.10</b> | 280,765                        | 98.59        | 168,387                        | 99.96        |
|                     | Inpatient                                       | 4,094                | 0.90         | 4,024                          | 1.41         | 70                             | 0.04         |
| Medical institution | Tertiary hospital / general hospital / hospital | 88,927               | 19.62        | 88,770                         | <b>31.17</b> | 157 *                          | 0.09 *       |
|                     | Clinic                                          | 195,944              | 43.23        | 195,944                        | <b>68.80</b> | -                              | -            |
|                     | KM hospital                                     | 3,241                | 0.72         | 75 *                           | 0.03 *       | 3,166                          | 1.88         |
|                     | KM clinic                                       | 165,134              | 36.43        | -                              | -            | 165,134                        | <b>98.03</b> |

Department of KM within a tertiary or general hospital or department of WM within a KM hospital \*

**Supplementary file 4.** Number of claims and medical expenditure per category

| Fees                                    | All                     |              |               |          | Western                 |              |               |              | Korean                  |              |               |              |
|-----------------------------------------|-------------------------|--------------|---------------|----------|-------------------------|--------------|---------------|--------------|-------------------------|--------------|---------------|--------------|
|                                         | Total expenditure (USD) |              | No. of claims |          | Total expenditure (USD) |              | No. of claims |              | Total expenditure (USD) |              | No. of claims |              |
|                                         | Avg. exp*               | Avg.CR*      | Avg. n*       | Avg. CR* | Avg. exp                | Avg. CR      | Avg. n        | Avg.CR       | Avg. exp                | Avg. CR      | Avg. n        | Avg.CR       |
| Examination                             | <b>500,739.63</b>       | 6.89         | 72,438.44     | 5.84     | <b>369,487.50</b>       | 8.19         | 52,831.44     | 7.90         | 131,252.13              | 2.79         | 19,607.00     | (0.40)       |
| Hospitalization                         | 74,283.06               | <b>13.32</b> | 2,075.11      | 16.25    | 71,060.43               | <b>16.34</b> | 2,031.56      | <b>17.47</b> | 3,222.62                | (16.65)      | 43.56         | (9.05)       |
| Medication                              | 24,738.25               | 10.89        | 20,601.11     | 5.07     | 17,728.08               | 10.93        | 14,104.44     | 1.73         | 7,010.16                | <b>10.80</b> | 6,496.67      | <b>17.53</b> |
| Injection / procedure                   | <b>219,020.66</b>       | 4.78         | 82,122.78     | 1.52     | 30,074.51               | 8.34         | 23,537.44     | 3.58         | <b>188,946.14</b>       | 4.16         | 58,585.33     | 0.64         |
| Anesthesia                              | 29,628.13               | 11.66        | 1,715.56      | 2.52     | 28,463.01               | 12.93        | 1,423.33      | 5.17         | -                       | -            | -             | -            |
| Physical therapy                        | 7,516.04                | 8.71         | 2,900.67      | 2.06     | 7,516.04                | 8.71         | 2,900.67      | 2.06         | -                       | -            | -             | -            |
| Treatment and surgery                   | 4,681.63                | <b>22.69</b> | 418.33        | 11.00    | 4,681.63                | <b>22.69</b> | 418.33        | 11.00        | -                       | -            | -             | -            |
| Testing                                 | <b>180,913.03</b>       | <b>16.22</b> | 40,227.78     | 9.43     | <b>180,913.03</b>       | <b>16.22</b> | 40,227.78     | 9.43         | 1,165                   | (15.97)      | 292.22        | (11.99)      |
| Radiological diagnosis and radiotherapy | 17,554.62               | 11.89        | 3,038.00      | 1.94     | 17,554.62               | 11.89        | 3,038.00      | 1.94         | -                       | -            | -             | -            |
| Special equipment                       | <b>132,005.79</b>       | 3.51         | 2,336.33      | 4.43     | <b>132,005.79</b>       | 3.51         | 2,336.33      | 4.43         | -                       | -            | -             | -            |
| Psychotherapy                           | 2,597.92                | 12.48        | 173.67        | 6.36     | 2,597.92                | 12.48        | 173.67        | 6.36         | -                       | -            | -             | -            |
| Others                                  | 2,468.07                | 3.78         | 144.78        | 7.04     | 2,468.07                | 3.78         | 144.78        | 7.04         | -                       | -            | -             | -            |

\* Avg. exp=Average gross expenditure over nine years; Avg. N=Average number of cases over nine years; Avg. CR=Average change rate over nine years  
 All expenditures were converted based on the annual average exchange rate (KRW/USD) and the price is adjusted as of health expenditure price level of year 2018. (See Supplementary file 1 for detail.)

**Supplementary file 5.** High frequency care for migraine in WM & KM Outpatients

|                                                                                   |                                                 | WM outpatients |                                     |                                       |
|-----------------------------------------------------------------------------------|-------------------------------------------------|----------------|-------------------------------------|---------------------------------------|
|                                                                                   |                                                 | Total claims   | Average expenditure per claim (USD) | Average expenditure per patient (USD) |
| Injection                                                                         | Subcutaneous or intramuscular (SC/IM) injection | <b>57,942</b>  | 1.14                                | 1.81                                  |
|                                                                                   | Intravenous (IV) injection                      | <b>16,307</b>  | 4.85                                | 6.14                                  |
|                                                                                   | Other injection                                 | 6,710          | 1.75                                | 2.08                                  |
| Block of the peripheral branch of the spinal nerve (peripheral nerve blocks; PNB) |                                                 | <b>8,033</b>   | <b>23.87</b>                        | <b>47.74</b>                          |
| Deep heat therapy (per day)                                                       |                                                 | 6,433          | 1.27                                | 2.24                                  |
| Superficial heat therapy (SHT)                                                    |                                                 | 7,995          | 0.61                                | 1.13                                  |
| Transcutaneous electrical nerve stimulation (TENS)                                |                                                 | 4,721          | 4.00                                | 7.18                                  |
| Interference current therapy (ICT)                                                |                                                 | 2,964          | 3.96                                | 9.45                                  |
| Personal psychotherapy                                                            |                                                 | 1,033          | 11.50                               | <b>37.35</b>                          |
| Laser therapy (per day)                                                           |                                                 | 602            | 6.07                                | 12.19                                 |
| Myofascial trigger point injection therapy                                        |                                                 | 565            | 8.62                                | 16.07                                 |
|                                                                                   |                                                 | KM Outpatients |                                     |                                       |
|                                                                                   |                                                 | Total claims   | Average expenditure per claim (USD) | Average expenditure per patient (USD) |
| Acupuncture                                                                       |                                                 | <b>166,430</b> | <b>6.85</b>                         | <b>27.86</b>                          |
| Hot/cold meridian therapy-Infrared irradiation therapy                            |                                                 | 50,715         | 0.81                                | 2.82                                  |
| Moxibustion (indirect moxibustion)                                                |                                                 | 37,573         | 2.29                                | 8.73                                  |
| Cupping (dry cupping)                                                             |                                                 | 30,503         | 3.43                                | 12.41                                 |
| Cupping (bloodletting cupping)                                                    |                                                 | 24,490         | 5.83                                | 14.35                                 |
| Electroacupuncture stimulation                                                    |                                                 | 22,345         | 3.73                                | 13.36                                 |
| Herbal formulation                                                                |                                                 | 21,823         | 0.40                                | 1.31                                  |
| Hot/cold meridian therapy-Therapy of cutaneous and muscle meridian                |                                                 | 9,214          | 0.83                                | 2.67                                  |
| Moxibustion (direct moxibustion)                                                  |                                                 | 5,578          | 5.45                                | 21.22                                 |

All expenditures were converted based on the annual average exchange rate (KRW/USD) and the price is adjusted as of health expenditure price level of year 2018. (See Supplementary file 1 for detail.)
